# Supplementary material for: Genetic Diversity of Viral Populations Associated with Ananas Germplasm and Improvement of Virus Diagnostic Protocols
Source: MDPI journal article supplement (doi:10.3390/pathogens11121470), 2022-12-05
Supplement: s1 [file s1]

Article

# Genetic diversity of viral populations associated with *Ananas* germplasm and improvement of virus diagnostic protocols

Adriana E. Larrea-Sarmiento<sup>1</sup>, Alejandro Olmedo-Velarde<sup>1</sup>, Xupeng Wang<sup>1</sup>, Wayne Borth<sup>1</sup>, Ryan Domingo<sup>2</sup>, Tracie K Matsumoto<sup>2</sup>, Jon Y Suzuki<sup>2</sup>, Marisa M Wall<sup>2</sup>, Michael J. Melzer<sup>1</sup>, John Hu<sup>1\*</sup>

<sup>1</sup> Department of Plant and Environmental Protection Sciences, University of Hawaii, Honolulu, HI 96822, U.S.A.; [aelarrea@hawaii.edu](mailto:aelarrea@hawaii.edu); [aolmedov@hawaii.edu](mailto:aolmedov@hawaii.edu); [xupeng@hawaii.edu](mailto:xupeng@hawaii.edu); [borth@hawaii.edu](mailto:borth@hawaii.edu); [melzer@hawaii.edu](mailto:melzer@hawaii.edu); [johnhu@hawaii.edu](mailto:johnhu@hawaii.edu)

<sup>2</sup> United States Department of Agriculture, Agricultural Research Service, Daniel K. Inouye U. S. Pacific Basin Agricultural Research Center, Hilo, HI 96720, U.S.A.; [ryan.domingo@usda.gov](mailto:ryan.domingo@usda.gov); [tracie.matsumoto@usda.gov](mailto:tracie.matsumoto@usda.gov); [jon.suzuki@usda.gov](mailto:jon.suzuki@usda.gov); [marisa.wall@usda.gov](mailto:marisa.wall@usda.gov)

\* Correspondence: [johnhu@hawaii.edu](mailto:johnhu@hawaii.edu); Tel.: (808) 956-7281

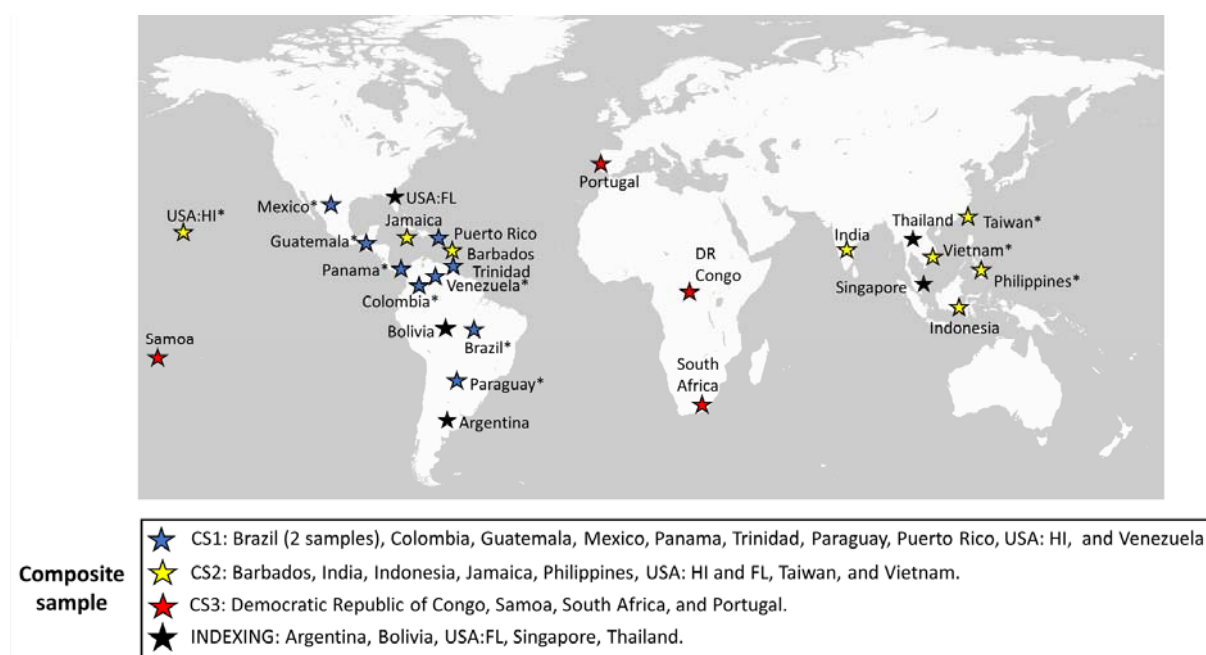

**Figure S1: Geographic origin of *Ananas comosus* accessions used for RNA-sequencing and virus indexing:** Country or region of origin of accessions submitted to RNA-sequencing: composite sample 1 (CS1), blue stars; CS2, yellow stars; CS3, red stars. Origin of accessions used only for virus indexing is represented by black stars. An asterisk (\*) represents a geographic origin with more than one accession submitted to RNA-sequencing and virus indexing.

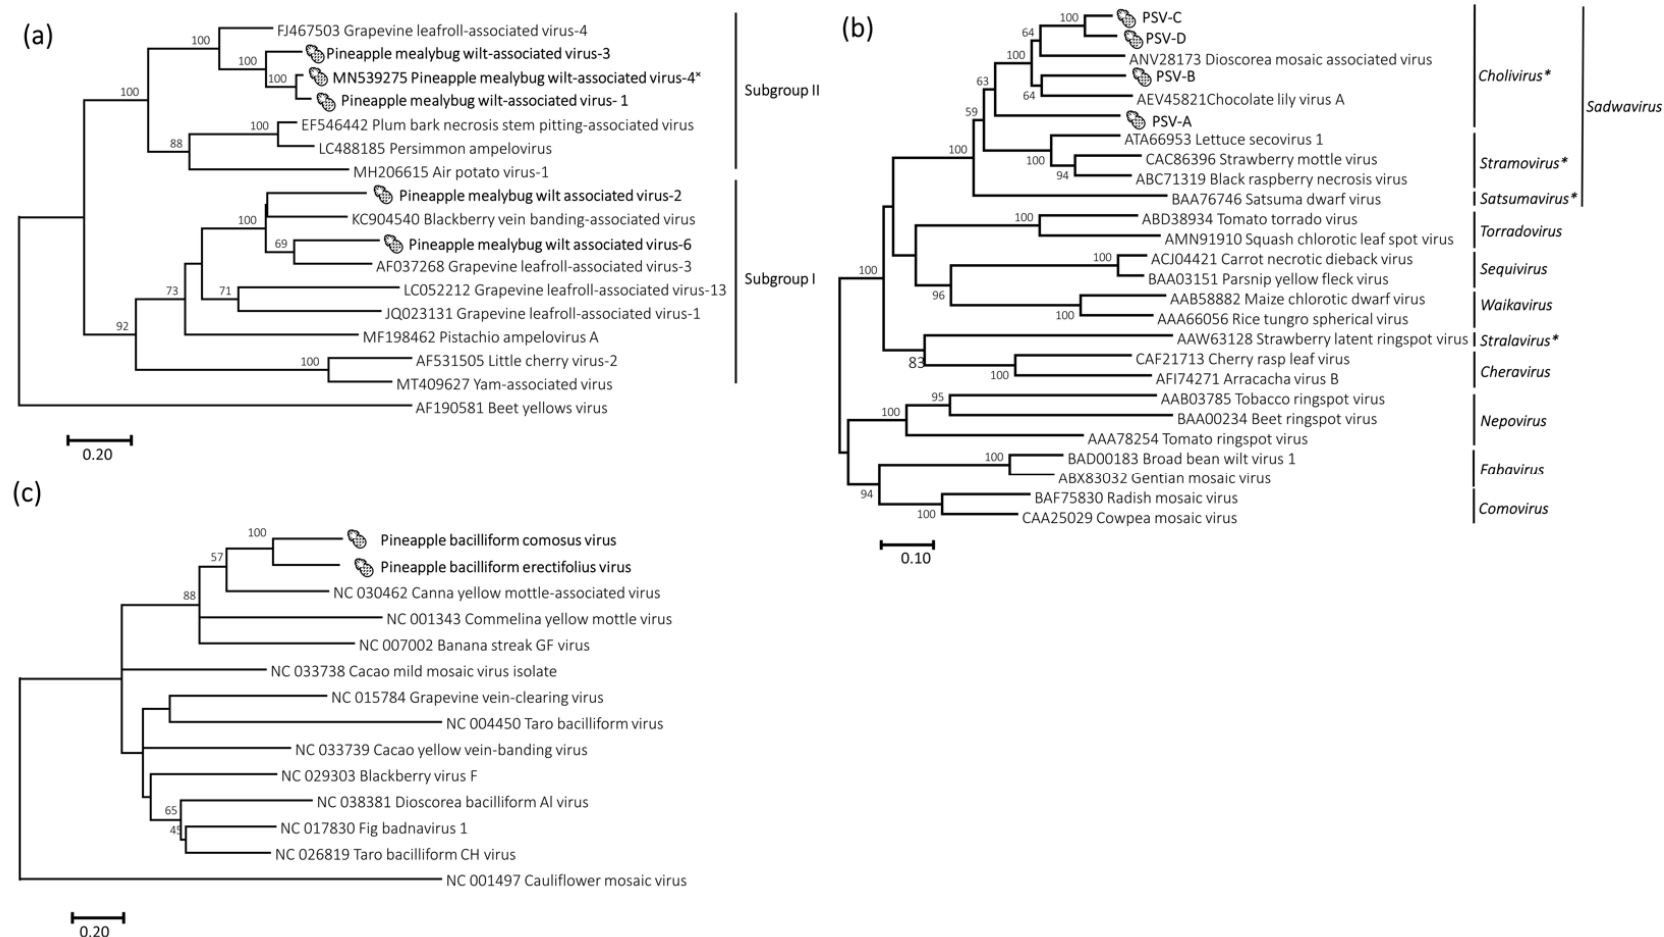

**Figure S2. Phylogenetic analysis of viruses infecting *Ananas* spp.:** (a) Phylogeny of the heat shock protein 70 (HSP70) of the pineapple mealybug wilt-associated virus (PMWaV) complex with homologs of members in the Ampelovirus genus. Four recognized *Ampelovirus* species have been characterized infecting pineapple: PMWaV-1, PMWaV-2, PMWav-3, and PMWaV-6. PMWaV-4, previously reported as another species, is currently known as variant of PMWaV-1. Beet yellows virus was used as an outgroup; (b) Unrooted phylogeny of the Pro-Pol protein region from members of the four *Sadwavirus* species characterized from pineapple with homologs of members within the family *Secoviridae*. Four sadwaviruses are reported

---

infecting pineapple: pineapple secovirus-A (PSV-A), PSV-B, PSV-C (new virus species infecting pineapple germplasm), and PSV-D (new virus species mined from an HTS dataset from China); **(c)** Phylogeny of the RT-RH1 nucleotide region of virus members infecting pineapple and classified within *Badnavirus* species with their homologs: pineapple bacilliform CO virus (PBcoV), and pineapple bacilliform ER virus (PBeV). Cauliflower mosaic virus was used as an outgroup.

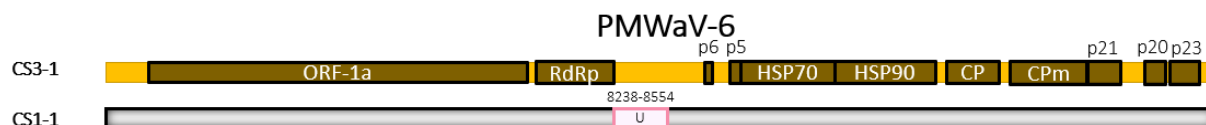

**Figure S3.** Map of recombination patterns and parental lineages of pineapple mealybug wilt-associated viruses-6 (PMWaV-6). Major parents are represented in light shade and minor parents in colored boxes. Events highlighted in light gray in the table were not considered for the analysis since did not provide the support for at least three out of the seven algorithms available in the RDP4 software. No recombination events were found in CS3-1 and the reference isolate of PMWaV-6 MW269512. U, unknown.

(a)

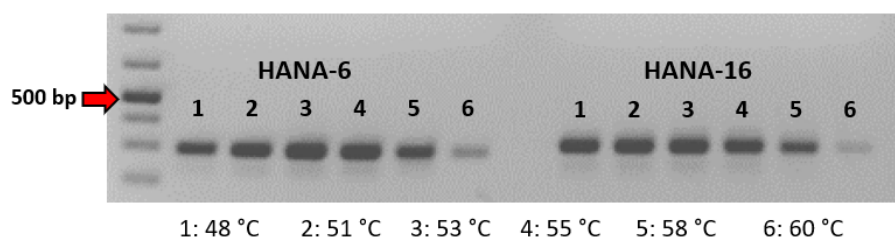

(b)

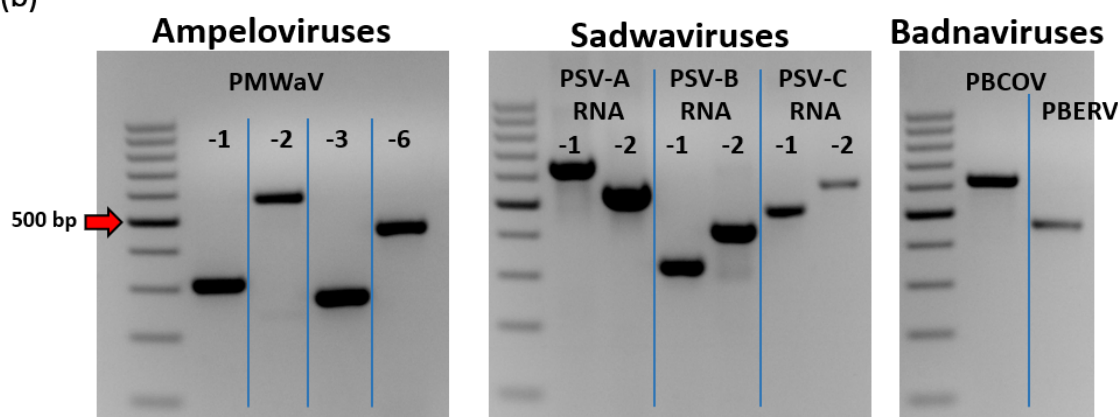

**Figure S4.** RT-PCR detection methods for viruses infecting pineapple: (a) Gradient PCR for PSV-B RNA-1 using two germplasm accessions, HANA-6 and HANA-16; (b) RT-PCR amplicons observed in a 1.5% agarose gel. RT-PCR products were amplified using virus-specific primer sets (Table 4.2) for ampeloviruses (PMWaV-1, -2, -3 and -6), sadwavirus (PSV-A, -B, and -C) and badnaviruses (PBCOV and PBERV). PSV-D was originally characterized from a dataset from China mined from the transcriptome shotgun assemble (TSA) database. PSV-D was not found in any Ananas germplasm accession used in virus indexing in this study. PMWaV, pineapple mealybug wilt-associated virus; PSV, pineapple secovirus; PBCOV, pineapple bacilliform CO virus; PBERV, pineapple bacilliform ER virus

**Table S1.** Number of high-throughput sequencing (HTS) reads and depth of coverage values for the viral contigs retrieved from pineapple germplasm accessions.

| Composite Sample (HTS) | Country of Origin                                                                            | No. Raw Reads | Virus      | Variant | GenBank accession | Average Length (nt) | No. Mapped Reads | Min. Coverage (No. Reads) | Max. Coverage (No. Reads) | Mean Coverage (No. reads) | Nt Identity to Reference (%) |
|------------------------|----------------------------------------------------------------------------------------------|---------------|------------|---------|-------------------|---------------------|------------------|---------------------------|---------------------------|---------------------------|------------------------------|
| CS1                    | Brazil, Colombia, Guatemala, México, Panamá, Paraguay, Puerto Rico, Trinidad, USA, Venezuela | 63,982,610    | PSV-A RNA1 | 1       | OP860242          | 6,185               | 16,839           | 1                         | 2,360                     | 204.1                     | 78.9%                        |
|                        |                                                                                              |               |            | 2       | OP860243          | 6,461               | 16,943           | 1                         | 901                       | 196.2                     | 78.7%                        |
|                        |                                                                                              |               | PSV-A RNA2 | 1       | OP860261          | 4,198               | 52,555           | 1                         | 2,207                     | 937.7                     | 88.2%                        |
|                        |                                                                                              |               |            | 2       | OP860262          | 4,134               | 32,208           | 1                         | 1,771                     | 583.9                     | 86.3%                        |
|                        |                                                                                              |               | PSV-B RNA1 | 1       | OP860259          | 5,967               | 16,579           | 2                         | 616                       | 206.6                     | 94.6%                        |
|                        |                                                                                              |               |            | 2       | OP860255          | 5,941               | 13,141           | 1                         | 1,048                     | 164.6                     | 77.0%                        |
|                        |                                                                                              |               |            | 3       | OP860250          | 5,911               | 10,284           | 2                         | 534                       | 129.5                     | 77.3%                        |
|                        |                                                                                              |               |            | 4       | OP860249          | 5,911               | 10,920           | 1                         | 559                       | 137.7                     | 77.2%                        |
|                        |                                                                                              |               |            | 5       | OP860251          | 5,912               | 10,950           | 1                         | 530                       | 137.8                     | 77.1%                        |
|                        |                                                                                              |               |            | 6       | OP860254          | 5,802               | 18,898           | 1                         | 601                       | 243.4                     | 77.0%                        |
|                        |                                                                                              |               |            | 7       | OP860253          | 6,015               | 19,709           | 1                         | 789                       | 243.9                     | 77.3%                        |
|                        |                                                                                              |               |            | 8       | OP860256          | 5,913               | 14,822           | 1                         | 846                       | 186.7                     | 76.9%                        |
|                        |                                                                                              |               |            | 9       | OP860252          | 5,921               | 20,423           | 1                         | 750                       | 257.1                     | 77.0%                        |
|                        |                                                                                              |               | PSV-B RNA2 | 1       | OP860265          | 3,918               | 11,569           | 1                         | 510                       | 219.9                     | 93.4%                        |
|                        |                                                                                              |               |            | 2       | OP860266          | 3,933               | 12,451           | 1                         | 937                       | 235.7                     | 94.4%                        |
|                        |                                                                                              |               |            | 3       | OP860267          | 3,153               | 7,576            | 1                         | 2,650                     | 147.4                     | 71.3%                        |
|                        |                                                                                              |               |            | 4       | OP860268          | 3,461               | 9,015            | 2                         | 567                       | 193.6                     | 72.3%                        |
|                        |                                                                                              |               |            | 5       | OP860269          | 3,823               | 9,162            | 2                         | 666                       | 178.1                     | 70.7%                        |
|                        |                                                                                              |               |            | 6       | OP860270          | 3,823               | 6,314            | 1                         | 431                       | 122.7                     | 70.7%                        |
|                        |                                                                                              |               |            | 7       | OP860271          | 3,820               | 5,618            | 1                         | 292                       | 109.1                     | 70.7%                        |
|                        |                                                                                              |               |            | 8       | OP860272          | 3,886               | 15,254           | 1                         | 1,381                     | 292.6                     | 70.9%                        |

CS, composite sample; USA, United States of America; PSV, pineapple secovirus.

References accessions: PSV-A: RNA1 MN809923 (6,128 bp), RNA2 MN809924 (4,161 bp); PSV-B: RNA1 OM777135 (5,956 bp), RNA2 OM777136 (3,808 bp);

PMWaV-1 MN539276 (13,071 bp); PMWaV-2 MN539272 (6,259 bp); PMWaV-3 MN539274 (13,298 bp); PMWaV-6 MW269512 (17,907 bp); PBCOV GQ398110 (7,451 bp); PBERV EU377673 (1,510 bp). PSV-D sequences recovered from TSA were annotated on GenBank: RNA-1 (BK062878), and RNA-2 (BK062878)

Continue Supplementary Table 1

| Compo-<br>site Sam-<br>ple (HTS) | Country of<br>Origin                                                                                                            | No. Raw<br>Reads | Virus      | Variant | GenBank<br>accession | Average<br>Length<br>(nt) | No.<br>Mapped<br>Reads | Min. Cover-<br>age (No.<br>Reads) | Max. Cover-<br>age (No.<br>Reads) | Mean Cover-<br>age (No.<br>reads) | Nt Ident-<br>ity to<br>Reference<br>(%) |
|----------------------------------|---------------------------------------------------------------------------------------------------------------------------------|------------------|------------|---------|----------------------|---------------------------|------------------------|-----------------------------------|-----------------------------------|-----------------------------------|-----------------------------------------|
| CS1                              | Brazil, Co-<br>lombia,<br>Guatemala,<br>México, Pa-<br>namá, Para-<br>guay,<br>Puerto Rico,<br>Trinidad,<br>USA, Vene-<br>zuela | 63,982,610       | PSV-B RNA2 | 9       | OP860273             | 3,709                     | 7,339                  | 1                                 | 364                               | 146.5                             | 72.5%                                   |
|                                  |                                                                                                                                 |                  |            | 10      | OP860274             | 3,821                     | 6,905                  | 2                                 | 907                               | 134.4                             | 70.6%                                   |
|                                  |                                                                                                                                 |                  |            | 11      | OP860275             | 3,821                     | 9,671                  | 2                                 | 678                               | 188.1                             | 71.1%                                   |
|                                  |                                                                                                                                 |                  |            | 12      | OP860276             | 4,052                     | 10,663                 | 1                                 | 952                               | 195.8                             | 70.8%                                   |
|                                  |                                                                                                                                 |                  |            | 13      | OP860277             | 3,871                     | 14,670                 | 1                                 | 1,403                             | 282.4                             | 70.6%                                   |
|                                  |                                                                                                                                 |                  |            | 14      | OP860278             | 3,918                     | 13,669                 | 1                                 | 579                               | 260.1                             | 71.2%                                   |
|                                  |                                                                                                                                 |                  |            | 15      | OP860279             | 3,898                     | 13,863                 | 1                                 | 575                               | 264.5                             | 71.2%                                   |
|                                  |                                                                                                                                 |                  | PBCOV      | 1       | OP860302             | 7,674                     | 2,023                  | 1                                 | 54                                | 19.8                              | 79.3%                                   |
|                                  |                                                                                                                                 |                  | PMWaV-1    | 1       | OP860291             | 13,064                    | 3,215                  | 1                                 | 123                               | 18.4                              | 91.8%                                   |
|                                  |                                                                                                                                 |                  | PMWaV-2    | 1       | OP860299             | 16,252                    | 28,082                 | 1                                 | 324                               | 129.0                             | 98.7%                                   |
|                                  |                                                                                                                                 |                  | PMWaV-3    | 1       | OP860287             | 13,396                    | 4,966                  | 1                                 | 72                                | 27.7                              | 95.5%                                   |
| CS2                              | Barbados,<br>India, Indo-<br>nesia, Ja-<br>maica, Phil-<br>ippines, Tai-<br>wan, USA,<br>Vietnam                                | 63,253,044       | PSV-A RNA1 | 1       | OP860244             | 6,130                     | 47,068                 | 2                                 | 1,385                             | 578.8                             | 91.0%                                   |
|                                  |                                                                                                                                 |                  |            | 2       | OP860245             | 6,127                     | 30,164                 | 1                                 | 1,136                             | 369.5                             | 90.6%                                   |
|                                  |                                                                                                                                 |                  | PSV-A RNA2 | 1       | OP860263             | 4,219                     | 31,726                 | 1                                 | 1,892                             | 564                               | 89.2%                                   |
|                                  |                                                                                                                                 |                  |            | 2       | OP860264             | 3,381                     | 24,099                 | 1                                 | 1,266                             | 533                               | 88.8%                                   |
|                                  |                                                                                                                                 |                  | PSV-B RNA1 | 1       | OP860258             | 5,951                     | 14,460                 | 2                                 | 657                               | 181.6                             | 91.5%                                   |
|                                  |                                                                                                                                 |                  |            | 2       | OP860246             | 5,991                     | 20,809                 | 1                                 | 783                               | 260.2                             | 76.3%                                   |
|                                  |                                                                                                                                 |                  | PSV-B RNA2 | 1       | OP860280             | 3,945                     | 31,272                 | 1                                 | 1,114                             | 595.2                             | 70.2%                                   |
|                                  |                                                                                                                                 |                  |            | 2       | OP860281             | 3,968                     | 20,045                 | 1                                 | 803                               | 377.8                             | 90.1%                                   |
|                                  |                                                                                                                                 |                  | PSV-C RNA1 | 1       | OP860260             | 4,474                     | 10,158                 | 1                                 | 260                               | 122.9                             | -                                       |
|                                  |                                                                                                                                 |                  | PSV-C RNA2 | 1       | OP860285             | 3,869                     | 5,694                  | 1                                 | 202                               | 110.2                             | -                                       |
|                                  |                                                                                                                                 |                  | PBCOV      | 1       | OP860303             | 7,932                     | 7,470                  | 1                                 | 334                               | 71                                | 65.2%                                   |

CS, composite sample; USA, United States of America; PSV, pineapple secovirus; PMWaV, pineapple mealybug wilt-associated virus; (d), defective.

References accessions: PSV-A: RNA1 MN809923 (6,128 bp), RNA2 MN809924 (4,161 bp); PSV-B: RNA1 OM777135 (5,956 bp), RNA2 OM777136 (3,808 bp);

PMWaV-1 MN539276 (13,071 bp); PMWaV-2 MN539272 (6,259 bp); PMWaV-3 MN539274 (13,298 bp); PMWaV-6 MW269512 (17,907 bp); PBCOV GQ398110 (7,451 bp); PBERV EU377673 (1,510 bp). PSV-D sequences recovered from TSA were annotated on GenBank: RNA-1 (BK062878), and RNA-2 (BK062878)

Continue Supplementary Table 1

| Compo-<br>site Sam-<br>ple (HTS) | Country of<br>Origin                                                                                | No. Raw<br>Reads | Virus       | Variant | GenBank<br>accession | Average<br>Length<br>(nt) | No.<br>Mapped<br>Reads | Min. Cover-<br>age (No.<br>Reads) | Max. Cover-<br>age (No.<br>Reads) | Mean Cover-<br>age (No.<br>reads) | Nt Identi-<br>ty to<br>Reference<br>(%) |
|----------------------------------|-----------------------------------------------------------------------------------------------------|------------------|-------------|---------|----------------------|---------------------------|------------------------|-----------------------------------|-----------------------------------|-----------------------------------|-----------------------------------------|
| CS2                              | Barbados,<br>India, In-<br>donesia, Ja-<br>maica,<br>Philip-<br>pines, Tai-<br>wan, USA,<br>Vietnam | 63,253,044       | PMWaV-1     | 1       | OP860292             | 13,093                    | 7,987                  | 0                                 | 231                               | 45.7                              | 98.1%                                   |
|                                  |                                                                                                     |                  | PMWaV-1 (d) | 2d      | OP860293             | 10,896                    | 6,736                  | 0                                 | 142                               | 46.3                              | 84.3%                                   |
|                                  |                                                                                                     |                  | PMWaV-2     | 1       | OP860301             | 16,217                    | 37,131                 | 1                                 | 510                               | 170.9                             | 98.7%                                   |
|                                  |                                                                                                     |                  | PMWaV-3     | 1       | OP860289             | 13,353                    | 2,348                  | 0                                 | 64                                | 13.1                              | 96.9%                                   |
|                                  |                                                                                                     |                  | PMWaV-3 (d) | 2d      | OP860290             | 7,387                     | 1,950                  | 1                                 | 62                                | 19.7                              | 91.1%                                   |
|                                  |                                                                                                     |                  | PMWaV-6     | 1       | OP860296             | 17,904                    | 5,693                  | 1                                 | 82                                | 23.2                              | 98.3%                                   |
| CS3                              | Portugal,<br>Samoa,<br>South Af-<br>rica, Zaire                                                     | 67,710,906       | PSV-B-RNA1  | 1       | OP860257             | 6,092                     | 94,442                 | 1                                 | 4,802                             | 110.9                             | 79.6%                                   |
|                                  |                                                                                                     |                  |             | 2       | OP860247             | 5,992                     | 9,937                  | 1                                 | 281                               | 124.1                             | 77.0%                                   |
|                                  |                                                                                                     |                  |             | 3       | OP860248             | 5,996                     | 10,388                 | 0                                 | 278                               | 129.7                             | 77.0%                                   |
|                                  |                                                                                                     |                  | PSV-B-RNA2  | 1       | OP860282             | 3,911                     | 60,677                 | 1                                 | 2,545                             | 1161.8                            | 71.2%                                   |
|                                  |                                                                                                     |                  |             | 2       | OP860283             | 3,936                     | 14,625                 | 1                                 | 703                               | 278.1                             | 92.9%                                   |
|                                  |                                                                                                     |                  |             | 3       | OP860284             | 3,888                     | 28,048                 | 1                                 | 1,087                             | 540.4                             | 71.2%                                   |
|                                  |                                                                                                     |                  | PBERV       | 1       | OP860304             | 7,623                     | 18,468                 | 1                                 | 1,408                             | 182.5                             | 90.7%                                   |
|                                  |                                                                                                     |                  | PMWaV-1     | 1       | OP860294             | 13,260                    | 2,722                  | 0                                 | 56                                | 15.4                              | 88.4%                                   |
|                                  |                                                                                                     |                  | PMWaV-1 (n) | 2n      | OP860295             | 13,199                    | 4,269                  | 0                                 | 66                                | 24.2                              | 86.1%                                   |
|                                  |                                                                                                     |                  | PMWaV-2     | 1       | OP860300             | 16,291                    | 45,136                 | 1                                 | 499                               | 207.3                             | 98.7%                                   |
|                                  |                                                                                                     |                  | PMWaV-3     | 1       | OP860288             | 13,248                    | 2,722                  | 1                                 | 55                                | 15.3                              | 96.4%                                   |
|                                  |                                                                                                     |                  | PMWaV-3 (n) | 2n      | OP860286             | 12,212                    | 4,481                  | 0                                 | 114                               | 27.5                              | 74.0%                                   |
|                                  |                                                                                                     |                  | PMWaV-6     | 1       | OP860298             | 17,859                    | 3,885                  | 0                                 | 36                                | 16.3                              | 98.4%                                   |

CS, composite sample; PSV, pineapple secovirus; PMWaV, pineapple mealybug wilt-associated virus; (n), new variant.

References accessions: PSV-A: RNA1 MN809923 (6,128 bp), RNA2 MN809924 (4,161 bp); PSV-B: RNA1 OM777135 (5,956 bp), RNA2 OM777136 (3,808 bp); PMWaV-1 MN539276 (13,071 bp); PMWaV-2 MN539272 (6,259 bp); PMWaV-3 MN539274 (13,298 bp); PMWaV-6 MW269512 (17,907 bp); PBCOV GQ398110 (7,451 bp); PBERV EU377673 (1,510 bp). PSV-D sequences recovered from TSA were annotated on GenBank: RNA-1 (BK062878), and RNA-2 (BK062878)

**Table S2.** Polyprotein 1 (P1) sequence nucleotide (lower left) and amino acid (upper right) percent identity comparisons between partial sequences of molecular variants of four species belonging to pineapple secoviruses (PSVs), genus *Sadwavirus*. Sequence comparisons are based on the coding region (polyprotein P1) of RNA1. Partial genome sequences of the first sadwavirus reported in pineapple, PSV-A (MN809923) were obtained from GenBank. PSV-D sequences (GFDK01044199) were obtained from Transcriptome Shotgun Assembly (TSA) databases.

|                                  |       |              |          | AMINO ACID SEQUECNE IDENTITY (%) |       |       |       |       |       |       |       |       |       |       |       |       |       |       |       |       |       |       |       |              |  |
|----------------------------------|-------|--------------|----------|----------------------------------|-------|-------|-------|-------|-------|-------|-------|-------|-------|-------|-------|-------|-------|-------|-------|-------|-------|-------|-------|--------------|--|
|                                  |       | PSV-A        |          |                                  |       |       |       | PSV-B |       |       |       |       |       |       |       |       |       |       |       |       |       | PSV-C |       | PSC-D        |  |
|                                  |       | Sequence ID  | MN809923 | CS1-1                            | CS1-2 | CS2-1 | CS2-2 | MWP   | CS1-1 | CS1-2 | CS1-3 | CS1-4 | CS1-5 | CS1-6 | CS1-7 | CS1-8 | CS1-9 | CS2-1 | CS2-2 | CS3-1 | CS3-2 | MWP   | CS2-1 | GFDK01044199 |  |
| NUCLEOTIDE SEQUENCE IDENTITY (%) | PSV-A | MN809923     |          | 92.4                             | 92.4  | 97.6  | 97.3  | 97.6  | 30.5  | 30.4  | 30.4  | 30.3  | 30.3  | 30.4  | 30.3  | 30.6  | 30.3  | 30.5  | 30.2  | 30.2  | 30.7  | 32.3  | 29.3  | 29.4         |  |
|                                  |       | CS1-1        | 80.2     |                                  | 99.9  | 93.7  | 92.6  | 92.7  | 30.6  | 30.7  | 30.7  | 30.7  | 30.7  | 30.7  | 30.6  | 30.9  | 30.5  | 30.5  | 30.4  | 30.5  | 31.0  | 32.5  | 29.4  | 29.4         |  |
|                                  |       | CS1-2        | 80.2     | 98.7                             |       | 93.7  | 92.6  | 92.7  | 30.6  | 30.7  | 30.7  | 30.7  | 30.7  | 30.7  | 30.6  | 30.9  | 30.5  | 30.5  | 30.4  | 30.5  | 31.0  | 32.5  | 29.4  | 29.5         |  |
|                                  |       | CS2-1        | 91.1     | 80.8                             | 80.9  |       | 98.8  | 98.2  | 32.3  | 32.2  | 32.2  | 32.1  | 32.1  | 32.2  | 32.1  | 32.3  | 32.1  | 32.3  | 31.8  | 31.8  | 32.4  | 34.6  | 31.1  | 31.4         |  |
|                                  |       | CS2-2        | 90.8     | 80.2                             | 80.4  | 95.2  |       | 97.9  | 30.5  | 30.4  | 30.4  | 30.4  | 30.4  | 30.4  | 30.4  | 30.6  | 30.3  | 30.5  | 30.1  | 30.2  | 30.8  | 32.3  | 29.2  | 29.4         |  |
|                                  |       | MWP          | 90.5     | 80.2                             | 80.4  | 92.2  | 91.1  |       | 30.7  | 30.6  | 30.5  | 30.5  | 30.5  | 30.5  | 30.5  | 30.8  | 30.4  | 30.8  | 30.2  | 30.4  | 30.8  | 32.5  | 29.4  | 29.5         |  |
|                                  | PSV-B | CS1-1        | 43.5     | 42.9                             | 42.8  | 44.5  | 43.7  | 43.8  |       | 87.9  | 88.0  | 87.9  | 88.0  | 88.2  | 88.2  | 88.2  | 88.3  | 98.6  | 88.9  | 91.5  | 88.1  | 99.3  | 37.1  | 37.4         |  |
|                                  |       | CS1-2        | 43.8     | 44.2                             | 44.3  | 45.0  | 44.3  | 44.0  | 76.7  |       | 98.9  | 98.8  | 98.7  | 98.4  | 96.8  | 98.7  | 97.4  | 88.1  | 88.3  | 87.6  | 97.4  | 90.6  | 36.8  | 37.9         |  |
|                                  |       | CS1-3        | 43.7     | 44.1                             | 44.1  | 45.1  | 44.6  | 44.0  | 77.0  | 93.5  |       | 99.6  | 99.7  | 99.1  | 97.3  | 98.1  | 96.6  | 88.1  | 88.2  | 87.4  | 97.2  | 90.5  | 36.7  | 37.8         |  |
|                                  |       | CS1-4        | 43.7     | 44.0                             | 44.0  | 45.0  | 44.5  | 44.0  | 77.1  | 93.3  | 98.5  |       | 99.7  | 98.8  | 97.5  | 97.9  | 96.8  | 87.9  | 88.3  | 87.4  | 97.2  | 90.5  | 36.8  | 37.7         |  |
|                                  |       | CS1-5        | 43.7     | 44.1                             | 44.1  | 45.1  | 44.7  | 44.1  | 76.8  | 93.7  | 99.2  | 98.3  |       | 98.9  | 97.4  | 97.9  | 96.8  | 88.1  | 88.3  | 87.5  | 97.3  | 90.5  | 36.7  | 37.8         |  |
|                                  |       | CS1-6        | 43.9     | 43.9                             | 44.0  | 44.9  | 44.5  | 44.0  | 76.7  | 90.3  | 94.6  | 94.2  | 94.4  |       | 98.2  | 97.5  | 97.5  | 88.2  | 88.4  | 87.6  | 96.9  | 90.6  | 36.8  | 37.9         |  |
|                                  |       | CS1-7        | 43.9     | 43.6                             | 43.6  | 44.8  | 44.4  | 43.9  | 76.5  | 87.9  | 91.7  | 91.8  | 91.6  | 96.7  |       | 95.7  | 99.3  | 88.3  | 88.4  | 87.5  | 96.2  | 90.6  | 37.0  | 38.1         |  |
|                                  |       | CS1-8        | 44.1     | 44.2                             | 44.0  | 44.9  | 44.2  | 44.0  | 76.8  | 94.9  | 91.3  | 91.9  | 90.5  | 87.9  | 85.1  |       | 96.2  | 88.2  | 88.6  | 88.0  | 97.6  | 90.6  | 37.0  | 38.2         |  |
|                                  |       | CS1-9        | 44.1     | 43.9                             | 44.0  | 45.0  | 44.3  | 44.1  | 76.2  | 92.3  | 87.4  | 87.5  | 87.3  | 92.4  | 95.7  | 88.5  |       | 88.4  | 88.4  | 87.7  | 96.3  | 90.8  | 37.1  | 38.2         |  |
|                                  |       | CS2-1        | 43.4     | 43.1                             | 43.0  | 44.2  | 43.5  | 43.5  | 91.4  | 76.6  | 76.9  | 76.8  | 76.9  | 76.4  | 76.8  | 76.8  | 76.5  |       | 88.7  | 91.7  | 88.0  | 98.7  | 37.2  | 37.8         |  |
|                                  |       | CS2-2        | 43.9     | 43.9                             | 43.9  | 44.8  | 44.0  | 44.3  | 76.7  | 76.3  | 76.3  | 76.4  | 76.2  | 76.1  | 76.0  | 76.8  | 76.1  | 76.8  |       | 89.1  | 88.5  | 90.4  | 37.0  | 37.3         |  |
|                                  |       | CS3-1        | 43.3     | 43.6                             | 43.7  | 44.6  | 43.9  | 43.8  | 79.6  | 76.2  | 75.7  | 75.7  | 75.8  | 75.5  | 75.6  | 76.5  | 75.9  | 79.2  | 76.6  |       | 87.7  | 92.9  | 36.5  | 37.3         |  |
|                                  |       | CS3-2        | 43.8     | 43.8                             | 43.8  | 44.7  | 44.2  | 44.2  | 77.0  | 90.1  | 88.0  | 88.1  | 88.0  | 86.1  | 85.3  | 91.2  | 87.3  | 76.9  | 76.6  | 76.6  |       | 90.4  | 37.0  | 38.3         |  |
|                                  |       | MWP          | 44.9     | 44.5                             | 44.4  | 46.4  | 45.2  | 45.2  | 94.7  | 78.0  | 78.1  | 78.2  | 78.0  | 77.9  | 78.1  | 78.0  | 77.9  | 91.7  | 77.3  | 80.2  | 77.9  |       | 39.4  | 39.8         |  |
|                                  | PSV-C | CS2-1        | 38.2     | 38.4                             | 38.3  | 39.9  | 38.6  | 38.4  | 48.8  | 48.3  | 48.5  | 48.4  | 48.3  | 48.4  | 48.4  | 48.4  | 48.5  | 49.5  | 48.9  | 48.3  | 48.1  | 50.9  |       | 74.9         |  |
|                                  | PSC-D | GFDK01044199 | 38.5     | 37.5                             | 37.4  | 40.1  | 38.6  | 38.2  | 48.5  | 48.8  | 48.8  | 48.8  | 48.9  | 48.9  | 48.8  | 48.7  | 48.7  | 49.0  | 47.9  | 48.1  | 49.1  | 49.8  | 69.0  |              |  |

Pathogens 2022, 11, x. <https://doi.org/10.3390/xxxxx>
